# Supplementary material for: Insight into the Phylogenetic Relationships and Evolutionary History of Pepper Cultivars (Capsicum annuum L.) through Comparative Analyses of Plastomes
Source: MDPI journal article supplement (doi:10.3390/horticulturae9101092), 2023-09-30
Supplement: s1 [file Supplementary materials.pdf › Supplementary materials.pdf]

# **Insight into the Phylogenetic Relationships and Evolutionary History of Pepper Cultivars (*Capsicum annuum* L.) through Comparative Analyses of Plastomes**

**Seona Yun <sup>1</sup> and Hyeran Kim <sup>1,2,3,\*</sup>**

<sup>1</sup>Institute of Life Sciences, Kangwon National University, Chuncheon 24341, Republic of Korea; syun0803@kangwon.ac.kr

<sup>2</sup>Department of Biological Sciences, Kangwon National University Chuncheon 24341, Republic of Korea

<sup>3</sup>Interdisciplinary Graduate Program in BIT Medical Convergence, Kangwon National University, Chuncheon 24341, Republic of Korea

\* Correspondence: ranny@kangwon.ac.kr

## Supplementary Materials

### CM334

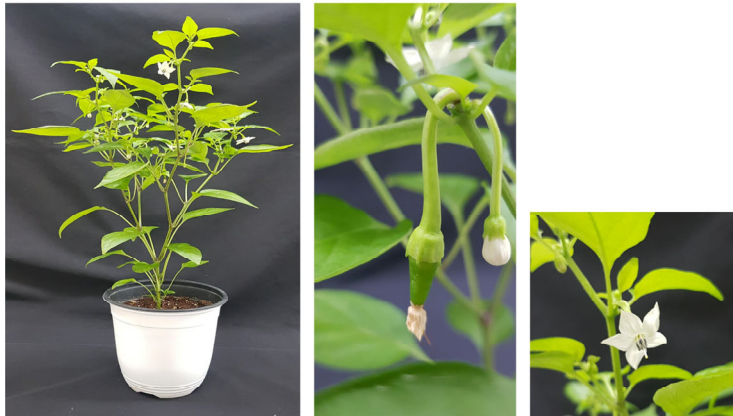

### C15

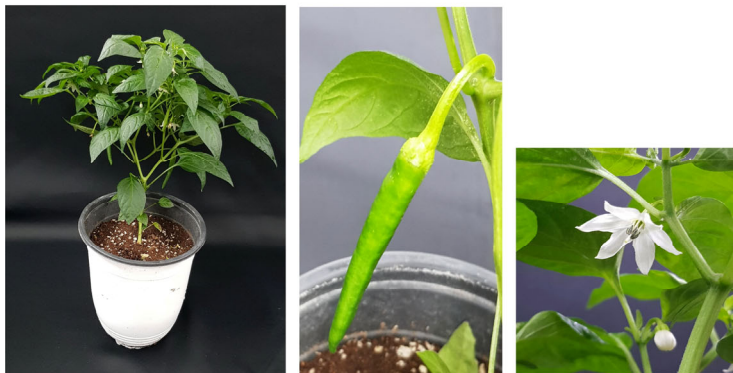

### Younggo 5 (Chilsungcho)

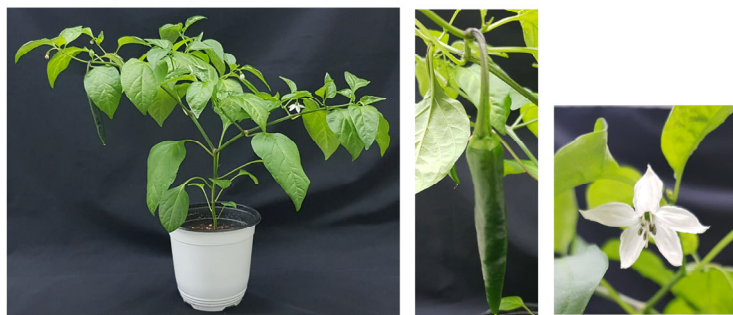

### Younggo 10 (Youwolcho)

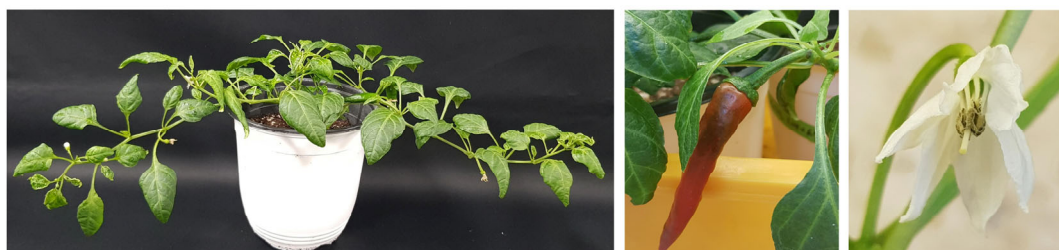

**Figure S1.** Photos of seven *Capsicum annuum* cultivars sequenced in this study (continued).

Younggo 11 (Tojong)

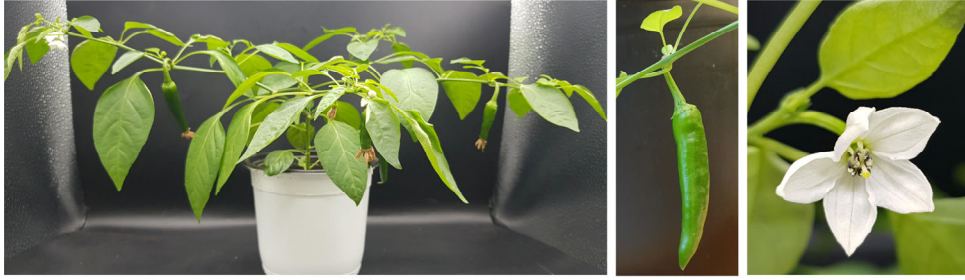

Dempsey

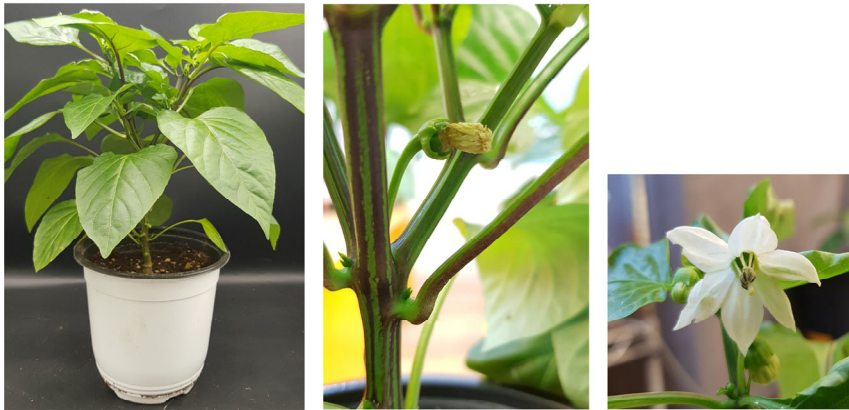

Ferrari

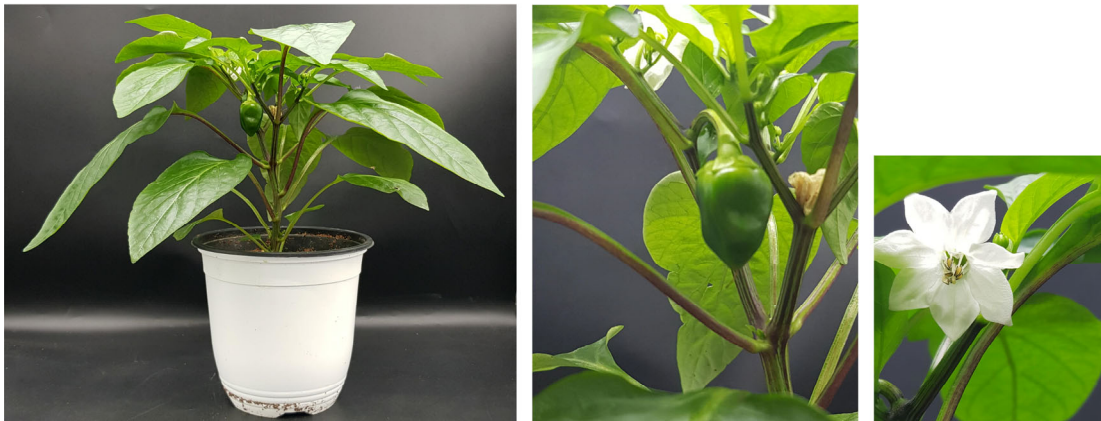

**Figure S1.** Photos of seven *Capsicum annuum* cultivars sequenced in this study.
