# Supplementary material for: Insight into the Phylogenetic Relationships and Evolutionary History of Pepper Cultivars (Capsicum annuum L.) through Comparative Analyses of Plastomes
Source: MDPI journal article supplement (doi:10.3390/horticulturae9101092), 2023-09-30
Supplement: s1 [file Table S1.xlsx]

## Sheet: Sheet1
Table S1. The codon usage frequency and ratio of relative synonymous codon usage in eight Capsicum annuum cultivars.
		C15		CM334		Younggo 5		Younggo 4/10/11		Dempsey		Ferrari
Codon	Amino acid	Frequency	RSCU	Frequency	RSCU	Frequency	RSCU	Frequency	RSCU	Frequency	RSCU	Frequency	RSCU
GCA	Alanine	355	1.11111	355	1.11111	355	1.11111	355	1.11111	355	1.11198	355	1.11111
GCC	Alanine	221	0.691706	221	0.691706	221	0.691706	221	0.691706	220	0.689115	221	0.691706
GCG	Alanine	131	0.410016	131	0.410016	131	0.410016	131	0.410016	131	0.410337	131	0.410016
GCU	Alanine	571	1.78717	571	1.78717	571	1.78717	571	1.78717	571	1.78857	571	1.78717
UGC	Cysteine	63	0.494118	63	0.494118	63	0.494118	63	0.494118	63	0.494118	63	0.494118
UGU	Cysteine	192	1.50588	192	1.50588	192	1.50588	192	1.50588	192	1.50588	192	1.50588
GAC	Aspartic acid	188	0.412281	188	0.413641	188	0.412281	188	0.412281	188	0.412733	187	0.410088
GAU	Aspartic acid	724	1.58772	721	1.58636	724	1.58772	724	1.58772	723	1.58727	725	1.58991
GAA	Glutamic acid	894	1.48136	894	1.48259	894	1.48136	894	1.48259	894	1.48259	894	1.48136
GAG	Glutamic acid	313	0.518641	312	0.517413	313	0.518641	312	0.517413	312	0.517413	313	0.518641
UUC	Phenylalanine	436	0.671803	437	0.673344	437	0.672825	437	0.672825	437	0.672825	436	0.671803
UUU	Phenylalanine	862	1.3282	861	1.32666	862	1.32717	862	1.32717	862	1.32717	862	1.3282
GGA	Glycine	626	1.54855	626	1.55143	626	1.54855	626	1.54855	625	1.54799	626	1.54855
GGC	Glycine	190	0.470006	187	0.463445	190	0.470006	190	0.470006	190	0.470588	190	0.470006
GGG	Glycine	274	0.677798	274	0.679058	274	0.677798	274	0.677798	273	0.676161	274	0.677798
GGU	Glycine	527	1.30365	527	1.30607	527	1.30365	527	1.30365	527	1.30526	527	1.30365
CAC	Histidine	120	0.451128	120	0.451128	120	0.451128	120	0.451128	120	0.451128	120	0.451128
CAU	Histidine	412	1.54887	412	1.54887	412	1.54887	412	1.54887	412	1.54887	412	1.54887
AUA	Isoleucine	588	0.910687	588	0.911628	589	0.911765	589	0.911765	588	0.909747	588	0.910687
AUC	Isoleucine	376	0.582344	375	0.581395	375	0.580495	375	0.580495	377	0.58329	376	0.582344
AUU	Isoleucine	973	1.50697	972	1.50698	974	1.50774	974	1.50774	974	1.50696	973	1.50697
AAA	Lysine	913	1.51535	913	1.51535	913	1.51535	913	1.51535	913	1.51661	913	1.51535
AAG	Lysine	292	0.484647	292	0.484647	292	0.484647	292	0.484647	291	0.483389	292	0.484647
CUA	Leucine	320	0.781441	320	0.782715	320	0.781441	320	0.781759	320	0.782077	320	0.780805
CUC	Leucine	159	0.388278	159	0.388912	159	0.388278	159	0.388436	158	0.386151	160	0.390403
CUG	Leucine	156	0.380952	156	0.381574	157	0.383394	157	0.38355	158	0.386151	156	0.380643
CUU	Leucine	520	1.26984	520	1.27191	520	1.26984	520	1.27036	520	1.27088	521	1.27125
UUA	Leucine	807	1.9707	803	1.96413	807	1.9707	806	1.96906	806	1.96986	807	1.96909
UUG	Leucine	495	1.20879	495	1.21076	494	1.20635	494	1.20684	493	1.20489	495	1.20781
AUG	Methionine	530	1	530	1	530	1	530	1	529	1	530	1
AAC	Asparagine	261	0.468161	261	0.468161	261	0.467742	261	0.467742	262	0.468694	261	0.468161
AAU	Asparagine	854	1.53184	854	1.53184	855	1.53226	855	1.53226	856	1.53131	854	1.53184
CCA	Proline	280	1.14519	280	1.14637	280	1.14519	280	1.14637	280	1.14637	280	1.14402
CCC	Proline	186	0.760736	186	0.761515	186	0.760736	186	0.761515	188	0.769703	186	0.759959
CCG	Proline	131	0.535787	130	0.532242	131	0.535787	130	0.532242	129	0.528147	131	0.53524
CCU	Proline	381	1.55828	381	1.55988	381	1.55828	381	1.55988	380	1.55578	382	1.56078
CAA	Glutamine	618	1.51285	618	1.51285	618	1.51285	618	1.51285	619	1.51345	618	1.51285
CAG	Glutamine	199	0.487148	199	0.487148	199	0.487148	199	0.487148	199	0.486553	199	0.487148
AGA	Arginine	392	1.73579	392	1.73579	392	1.73579	392	1.73579	393	1.73894	392	1.73579
AGG	Arginine	134	0.593358	134	0.593358	134	0.593358	134	0.593358	135	0.597345	134	0.593358
CGA	Arginine	342	1.51439	342	1.51439	342	1.51439	342	1.51439	341	1.50885	342	1.51439
CGC	Arginine	89	0.394096	89	0.394096	89	0.394096	89	0.394096	89	0.393805	89	0.394096
CGG	Arginine	103	0.456089	103	0.456089	103	0.456089	103	0.456089	103	0.455752	103	0.456089
CGU	Arginine	295	1.30627	295	1.30627	295	1.30627	295	1.30627	295	1.30531	295	1.30627
AGC	Serine	101	0.350087	100	0.347021	100	0.346021	100	0.34622	101	0.350087	101	0.350087
AGU	Serine	364	1.2617	363	1.25969	366	1.26644	366	1.26717	365	1.26516	364	1.2617
UCA	Serine	338	1.17158	338	1.17293	338	1.16955	338	1.17023	339	1.17504	338	1.17158
UCC	Serine	255	0.883882	255	0.884905	255	0.882353	255	0.882862	254	0.880416	255	0.883882
UCG	Serine	170	0.589255	170	0.589936	170	0.588235	170	0.588575	171	0.592721	170	0.589255
UCU	Serine	503	1.7435	503	1.74552	505	1.7474	504	1.74495	501	1.73657	503	1.7435
ACA	Threonine	348	1.16388	348	1.16681	348	1.16388	348	1.16388	348	1.16291	348	1.16388
ACC	Threonine	237	0.792642	237	0.794635	237	0.792642	237	0.792642	238	0.795322	237	0.792642
ACG	Threonine	135	0.451505	135	0.45264	135	0.451505	135	0.451505	136	0.45447	135	0.451505
ACU	Threonine	476	1.59197	473	1.58592	476	1.59197	476	1.59197	475	1.5873	476	1.59197
GUA	Valine	489	1.50926	490	1.51118	489	1.51042	489	1.51042	489	1.51042	489	1.50926
GUC	Valine	156	0.481481	157	0.484194	157	0.484942	157	0.484942	156	0.481853	156	0.481481
GUG	Valine	168	0.518519	169	0.521203	168	0.518919	168	0.518919	170	0.525097	168	0.518519
GUU	Valine	483	1.49074	481	1.48342	481	1.48571	481	1.48571	480	1.48263	483	1.49074
UGG	Tryptophan	415	1	415	1	415	1	415	1	413	1	415	1
UAC	Tyrosine	172	0.406619	172	0.406139	172	0.406619	172	0.406619	172	0.406619	172	0.406619
UAU	Tyrosine	674	1.59338	675	1.59386	674	1.59338	674	1.59338	674	1.59338	674	1.59338
UAA	Stop	40	1.51899	40	1.51899	40	1.51899	40	1.51899	40	1.51899	40	1.51899
UAG	Stop	21	0.797468	21	0.797468	21	0.797468	21	0.797468	21	0.797468	21	0.797468
UGA	Stop	18	0.683544	18	0.683544	18	0.683544	18	0.683544	18	0.683544	18	0.683544
