# Supplementary material for: Insight into the Phylogenetic Relationships and Evolutionary History of Pepper Cultivars (Capsicum annuum L.) through Comparative Analyses of Plastomes
Source: MDPI journal article supplement (doi:10.3390/horticulturae9101092), 2023-09-30
Supplement: s1 [file Table S2.xlsx]

## Sheet: Ka_Ks
Sequence	Method	Ka	Ks	Ka/Ks	Model
CM334
cemA	MS	0.00215298	4.30595e-05	50	HKY
clpP	MS	0.00225637	4.51273e-05	50	F81
ndhD	MS	0.000934546	1.86909e-05	50	HKY
ndhH	MS	0.00106532	2.13064e-05	50	F81
psbL	MS	0.0146454	0.000292909	50	HKY
rbcL	MS	0.00265907	5.31815e-05	50	F81
rpl20	MS	0.00277582	5.55164e-05	50	F81
rpoB	MS	0.000415688	1.07067e-05	38.825	HKY
rpoC2	MS	0.000596765	1.19353e-05	50	F81
C15
cemA	MS	0.00215298	4.30595e-05	50	HKY
clpP	MS	0.00225637	4.51273e-05	50	F81
ndhD	MS	0.000934546	1.86909e-05	50	HKY
ndhH	MS	0.00106532	2.13064e-05	50	F81
ndhI	MS	0.00276798	5.53596e-05	50	HKY
psaA	MS	0.000624825	1.40661e-05	44.4207	HKY
psbL	MS	0.0146454	0.000292909	50	HKY
rbcL	MS	0.00265907	5.31815e-05	50	F81
rpl20	MS	0.00279175	5.5835e-05	50	F81
rpoB	MS	0.000415688	1.07067e-05	38.825	HKY
rpoC2	MS	0.000596765	1.19353e-05	50	F81
Younggo 5
cemA	MS	0.00215298	4.30595e-05	50	HKY
clpP	MS	0.00225637	4.51273e-05	50	F81
ndhD	MS	0.000934546	1.86909e-05	50	HKY
ndhH	MS	0.00106532	2.13064e-05	50	F81
petA	MS	0.001466	2.932e-05	50	HKY
psbL	MS	0.0146454	0.000292909	50	HKY
rbcL	MS	0.00265907	5.31815e-05	50	F81
rpl20	MS	0.00277582	5.55164e-05	50	F81
rpoB	MS	0.000415688	1.07067e-05	38.825	HKY
rpoC2	MS	0.000596765	1.19353e-05	50	F81
Younggo 4/10/11
cemA	MS	0.00215298	4.30595e-05	50	HKY
clpP	MS	0.00225637	4.51273e-05	50	F81
ndhD	MS	0.000934546	1.86909e-05	50	HKY
ndhH	MS	0.00106532	2.13064e-05	50	F81
petA	MS	0.001466	2.932e-05	50	HKY
psbL	MS	0.0146454	0.000292909	50	HKY
rbcL	MS	0.00265907	5.31815e-05	50	F81
rpl20	MS	0.00277582	5.55164e-05	50	F81
rpoB	MS	0.000415688	1.07067e-05	38.825	HKY
rpoC2	MS	0.000596765	1.19353e-05	50	F81
Dempsey
ndhD	MS	0.000934546	1.86909e-05	50	HKY
psbL	MS	0.0146454	0.000292909	50	HKY
ycf1	MS	0.000209848	4.19696e-06	50	F81
Ferrari
cemA	MS	0.00215298	4.30595e-05	50	HKY
clpP	MS	0.00225637	4.51273e-05	50	F81
ndhD	MS	0.000934546	1.86909e-05	50	HKY
ndhH	MS	0.00106532	2.13064e-05	50	F81
ndhI	MS	0.00276798	5.53596e-05	50	HKY
psaA	MS	0.000624825	1.40661e-05	44.4207	HKY
psbL	MS	0.0146454	0.000292909	50	HKY
rbcL	MS	0.00265907	5.31815e-05	50	F81
rpl20	MS	0.00277582	5.55164e-05	50	F81
rpoB	MS	0.000415688	1.07067e-05	38.825	HKY
rpoC2	MS	0.000596765	1.19353e-05	50	F81
